# Supplementary material for: Decoding the Neuroprotective Potential of Methyl Gallate-Loaded Starch Nanoparticles against Beta Amyloid-Induced Oxidative Stress-Mediated Apoptosis: An In Vitro Study
Source: MDPI journal article supplement (doi:10.3390/pharmaceutics13030299), 2021-02-25
Supplement: s1 [file s1]

# Supplementary Materials: Decoding the Neuroprotective Potential of Methyl Gallate-Loaded Starch Nanoparticles against Beta Amyloid-Induced Oxidative Stress-Mediated Apoptosis: An In Vitro Study

Prakashkumar Nallasamy, Bhagavathi Sundaram Sivamaruthi, Chaiyavat Chaiyasut and Natarajan Suganthi

## Trypan blue exclusion assay:

### Methodology

Cytotoxic effect of A $\beta$  (25–35) in Neuro2A cells were evaluated by trypan blue dye exclusion method, Neuro2A ( $1 \times 10^6$  cells) were treated with various dose of A $\beta$  (25–35) (10–50  $\mu$ M) for 24 h at 37 °C to fix the lethal dose. After the toxic dose fixation, the cells were pretreated with different concentration of SEMG (20–100  $\mu$ g/ml) followed by exposure to A $\beta$  (25–35) at the toxic dose of 20  $\mu$ M for 24 h at 37 °C. Following treatment, the cells were subjected to PBS wash and incubated with trypan blue (10  $\mu$ g/mL) for 10 min. Number of live (transparent) and dead cells (blue) were analyzed using hemocytometer and the percentage of live cells was calculated.

### Results

Figure S1 showed dose dependent decrease in the cell viability with  $71.23 \pm 0.02\%$  viability at 20  $\mu$ M concentration of A $\beta$  (25–35) correlating the results of MTT and this dose was fixed as toxic dose for neuroprotective studies of SEMG. Exposure to 20  $\mu$ M of A $\beta$  (25–35) showed decrease in cell viability by  $65.23 \pm 0.023\%$  while cells, pretreated with SEMG restored the viability of cells exposed to A $\beta$  (25–35) in dose dependant manner exhibiting  $92.25 \pm 0.03\%$  viable cells at 100  $\mu$ g/ml of SEMG revealing the neuroprotective effect of SEMG against A $\beta$  toxicity.

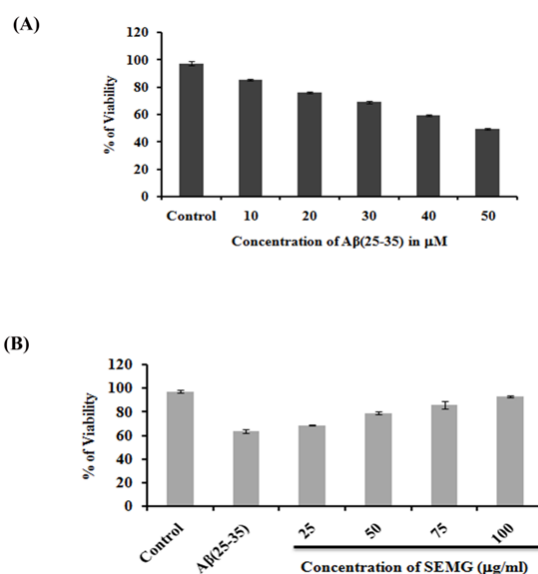

Figure S1: (A) Assessment of *in vitro* cytotoxic effect of A $\beta$  (25–35) (10–50  $\mu$ M) in Neuro 2A cell lines; (B) Evaluation of protective effect of SEMG against A $\beta$  (25–35) induced toxicity by trypan blue exclusion assay.
